# Supplementary material for: Improving the stability of hydrazinium pentazolate through cocrystallization
Source: Royal Society of Chemistry journal article supplement (doi:10.1039/d2ce01707e), 2023-01-01
Supplement: d2ce01707e1.pdf [file d2ce01707e1.pdf]

## **Electronic Supplementary Information**

# **Improving stability of the hydrazinium pentazolate through cocrystallization**

Jianxin Zhou, Xinyi Li, Tianyang Hou, Ze Xu, Pengcheng Wang, Ming Lu,\* and  
Yuangan Xu\*

School of Chemistry and Chemical Engineering, Nanjing University of Science and  
Technology, Nanjing 210094, Jiangsu, China.

E-mail: [luming@njust.edu.cn](mailto:luming@njust.edu.cn); [yuanganxu@163.com](mailto:yuanganxu@163.com)

## Table of Contents

|    |                                                               |    |
|----|---------------------------------------------------------------|----|
| 1. | Experimental                                                  | S1 |
| 2. | Single-crystal X-ray diffraction analysis of $N_2H_5N_5$ /PDO | S3 |
| 3. | Single-crystal X-ray diffraction analysis of PDO              | S4 |
| 4. | The noncovalent interactions study                            | S5 |
| 5. | IR spectrum                                                   | S6 |
| 6. | NMR spectra                                                   | S6 |
| 7. | PXRD patterns                                                 | S7 |
| 8. | Computational details                                         | S8 |
| 9. | References                                                    | S9 |

## 1. Experimental

**Caution:** Although no detonations were encountered during the preparation and purification of the *cyclo*-N<sub>5</sub><sup>-</sup>-containing energetic compounds, all these compounds we prepared are potentially energetic materials. Proper safety practices and equipment were used to prevent an explosion due to friction, heat, static shock, or impact. Caution should be exercised at all times when handling of any of materials.

### General methods

Single-crystal X-ray diffraction measurements were conducted on a Bruker D8 QUEST PHOTON 100 diffractometer using Mo-K $\alpha$  radiation ( $\lambda = 0.71073 \text{ \AA}$ ) at 296 K. <sup>1</sup>H and <sup>13</sup>C spectra were recorded using a 500 MHz (Bruker AVANCE III 500) nuclear magnetic resonance spectrometer operating at 500 and 125.72 MHz, respectively. Chemical shifts in the <sup>1</sup>H and <sup>13</sup>C spectra are reported relative to Me<sub>4</sub>Si as an external standard. IR spectra were recorded on a Thermo Nicolet iS10 spectrometer equipped with a Thermo Scientific Smart iTR diamond ATR accessory. Raman spectra were collected using a Renishaw inVia Raman Microscope equipped with a Leica microscope, 532 nm laser, 1800 lines/mm grating, 50  $\mu\text{m}$  slit and a RenCam CCD detector. Spectra were collected in extended scan mode with a range of 4000-100  $\text{cm}^{-1}$ . Powder X-ray diffraction patterns were performed on a Bruker D8 Advance X-ray diffractometer using Cu K $\alpha$  ( $\lambda = 1.5406 \text{ \AA}$ ) radiation. Samples were gently grind with a mortar. The powder patterns were collected by scanning  $2\theta$  from 5° to 80° with a step size of 0.02° and a step speed of 0.1 second. DSC plots were acquired on a differential scanning calorimeter (NETZSCH DSC 204 F1 Phoenix) at a scan rate of 5 °C min<sup>-1</sup> in perforated Al containers under a nitrogen flow of 60 mL min<sup>-1</sup>. TGA were also performed at a heating rate of 5 °C min<sup>-1</sup> in flowing high-purity nitrogen on a Mettler Toledo TGA/SDTA851<sup>e</sup> instrument. Elemental analyses were carried out on a vario EL III CHNOS elemental analyzer. Impact and friction sensitivity measurements were performed using a standard BAM Fall hammer and BAM friction tester.

### Synthesis

N<sub>2</sub>H<sub>5</sub>N<sub>5</sub> and PDO were prepared based on the literature methods.<sup>1,2</sup>

N<sub>2</sub>H<sub>5</sub>N<sub>5</sub>/PDO: 0.5 mmol N<sub>2</sub>H<sub>5</sub>N<sub>5</sub> and 0.25 mmol PDO are dissolving in methanol aqueous solution in a 4 mL glass vial. The cocrystal N<sub>2</sub>H<sub>5</sub>N<sub>5</sub>/PDO was initially obtained

from methanol/H<sub>2</sub>O (1:1 volume ratio) solutions. The solution was allowed to evaporate slowly at 2-8 °C over several days. Alternative solvents reliably producing N<sub>2</sub>H<sub>5</sub>N<sub>5</sub>/PDO form include ethanol / H<sub>2</sub>O (1:1 volume ratio) and acetonitrile / H<sub>2</sub>O (1:1 volume ratio). Yield (86 %). *T*<sub>d</sub>: 101 °C. <sup>1</sup>H NMR: δ 8.26 (s, 4H, =CH-CH=), 7.03 (s, 10H, N<sub>2</sub>H<sub>5</sub>) ppm. <sup>13</sup>C NMR: δ 136.59 ppm. IR (ATR):  $\tilde{\nu}$  3311, 2842, 2708, 1588, 1506, 1485, 1448, 1412, 1251, 1218, 1182, 1087, 1052, 1001, 967, 860, 802, 707, 540 cm<sup>-1</sup>. Elemental analysis for C<sub>4</sub>H<sub>14</sub>N<sub>16</sub>O<sub>2</sub> (318.266): calcd C 15.10, H 4.43, N 70.42 %. Found: C 15.12, H 4.35, N 70.50 %. IS: 35 J. FS: 300 N.

### Measurement of hygroscopicity

1. Before the test, the sample shall be dried in a vacuum oven at 50 °C for 2 h.
2. Dryer A is filled with saturated NaCl solution, and dryer B is filled with indicator desiccant. Dryers A and B are placed in a thermostat at 25 °C.
3. Place the weighing bottle in dryer A, cover lid after the mass remains unchanged, and then place it in dryer B for 30 min, and then weigh it for standby.
4. Accurately weigh the sample (about 5 g) and place it in a weighing bottle with known mass.
5. Place the weighing bottle containing the sample in dryer A, remove the weighing bottle lid, and put the lid in dryer A, cover the cap of dryer A, and keep it at constant temperature for 3 h.
6. Close the lid of the weighing bottle, move the weighing bottle into dryer B, and place it for 30 min before weighing.
7. Then put the weighing bottle into dryer A, keep it constant for 3 h, and so on, until the difference between two consecutive weighing is not more than 0.0003 g.
8. The hygroscopicity value is the percentage of water absorbed by the sample in the sample mass.

## 2. Single-crystal X-ray diffraction analysis of N<sub>2</sub>H<sub>5</sub>N<sub>5</sub>/PDO

**Table S1.** Crystal data, data collection, and refinement for N<sub>2</sub>H<sub>5</sub>N<sub>5</sub>/PDO

|                                                                                                                   |                                                                                                                                                                       |
|-------------------------------------------------------------------------------------------------------------------|-----------------------------------------------------------------------------------------------------------------------------------------------------------------------|
| C <sub>4</sub> H <sub>4</sub> N <sub>2</sub> O <sub>2</sub> ·2(N <sub>5</sub> )·2(H <sub>5</sub> N <sub>2</sub> ) | Z = 1                                                                                                                                                                 |
| M <sub>r</sub> = 318.31                                                                                           | F(000) = 166                                                                                                                                                          |
| Triclinic, P <sup>-</sup> 1                                                                                       | D <sub>x</sub> = 1.608 Mg m <sup>-3</sup>                                                                                                                             |
| a = 6.6303 (4) Å                                                                                                  | Mo Kα radiation, λ = 0.71073 Å                                                                                                                                        |
| b = 7.8338 (5) Å                                                                                                  | Cell parameters from 3091 reflections                                                                                                                                 |
| c = 7.9449 (5) Å                                                                                                  | θ = 3.0–27.5°                                                                                                                                                         |
| α = 117.137 (2)°                                                                                                  | μ = 0.13 mm <sup>-1</sup>                                                                                                                                             |
| β = 93.126 (2)°                                                                                                   | T = 296 K                                                                                                                                                             |
| γ = 111.674 (2)°                                                                                                  | Block, colourless                                                                                                                                                     |
| V = 328.63 (4) Å <sup>3</sup>                                                                                     | 0.21 × 0.15 × 0.12 mm                                                                                                                                                 |
| Bruker D8 QUEST PHOTON 100 diffractometer                                                                         | 1265 reflections with I > 2σ(I)                                                                                                                                       |
| Detector resolution: 10.42 pixels mm <sup>-1</sup>                                                                | R <sub>int</sub> = 0.023                                                                                                                                              |
| φ and ω scans                                                                                                     | θ <sub>max</sub> = 27.6°, θ <sub>min</sub> = 3.0°                                                                                                                     |
| Absorption correction: multi-scan SADABS                                                                          | h = -8→8                                                                                                                                                              |
| T <sub>min</sub> = 0.685, T <sub>max</sub> = 0.746                                                                | k = -10→10                                                                                                                                                            |
| 5080 measured reflections                                                                                         | l = -10→10                                                                                                                                                            |
| 1519 independent reflections                                                                                      |                                                                                                                                                                       |
| Refinement on F <sup>2</sup>                                                                                      | 0 restraints                                                                                                                                                          |
| Least-squares matrix: full                                                                                        | Hydrogen site location: mixed                                                                                                                                         |
| R[F <sup>2</sup> > 2σ(F <sup>2</sup> )] = 0.050                                                                   | H-atom parameters constrained                                                                                                                                         |
| wR(F <sup>2</sup> ) = 0.142                                                                                       | w = 1/[σ <sup>2</sup> (F <sub>o</sub> <sup>2</sup> ) + (0.0755P) <sup>2</sup> + 0.1294P]<br>where P = (F <sub>o</sub> <sup>2</sup> + 2F <sub>c</sub> <sup>2</sup> )/3 |
| S = 1.08                                                                                                          | (Δ/σ) <sub>max</sub> < 0.001                                                                                                                                          |
| 1519 reflections                                                                                                  | Δ <sub>max</sub> = 0.46 e Å <sup>-3</sup>                                                                                                                             |
| 100 parameters                                                                                                    | Δ <sub>min</sub> = -0.35 e Å <sup>-3</sup>                                                                                                                            |

Data collection: Bruker *APEX3*; cell refinement: Bruker *SAINT*; data reduction: Bruker *SAINT*; program(s) used to solve structure: SHELXT 2014/5 (Sheldrick, 2014); program(s) used to refine structure: *SHELXL2018/3* (Sheldrick, 2018); molecular graphics: Bruker *SHELXTL*; software used to prepare material for publication: Bruker *SHELXTL*.

**Table S2.** Hydrogen bonds (Å, °) for N<sub>2</sub>H<sub>5</sub>N<sub>5</sub>/PDO

|         |     |       |       |         |
|---------|-----|-------|-------|---------|
| D—H···A | D—H | H···A | D···A | D—H···A |
|---------|-----|-------|-------|---------|

|                            |      |      |             |     |
|----------------------------|------|------|-------------|-----|
| C1—H1···N8 <sup>ii</sup>   | 0.93 | 2.67 | 3.385 (2)   | 134 |
| C1—H1···N8 <sup>iii</sup>  | 0.93 | 2.61 | 3.138 (2)   | 117 |
| C2—H2···N4 <sup>ii</sup>   | 0.93 | 2.53 | 3.434 (2)   | 163 |
| N7—H7A···N1 <sup>iii</sup> | 0.89 | 2.16 | 2.971 (2)   | 151 |
| N7—H7A···N2 <sup>iv</sup>  | 0.89 | 2.58 | 3.056 (2)   | 114 |
| N7—H7B···O1                | 0.89 | 1.87 | 2.7398 (19) | 167 |
| N7—H7C···N3 <sup>v</sup>   | 0.89 | 2.22 | 3.005 (2)   | 147 |
| N7—H7C···N4 <sup>v</sup>   | 0.89 | 2.59 | 3.111 (2)   | 118 |
| N8—H8B···N4                | 0.82 | 2.66 | 3.446 (2)   | 161 |
| N8—H8B···N5                | 0.82 | 1.91 | 2.722 (2)   | 170 |

Symmetry codes: (ii)  $x, y, z-1$ ; (iii)  $-x+1, -y+2, -z+1$ ; (iv)  $x+1, y+1, z+1$ ; (v)  $-x+1, -y+1, -z+1$ .

### 3. Single-crystal X-ray diffraction analysis of PDO

**Table S3.** Crystal data, data collection, and refinement for PDO

|                                                             |                                                                     |
|-------------------------------------------------------------|---------------------------------------------------------------------|
| C <sub>4</sub> H <sub>4</sub> N <sub>2</sub> O <sub>2</sub> | $F(000) = 116$                                                      |
| $M_r = 112.09$                                              | $D_x = 1.597 \text{ Mg m}^{-3}$                                     |
| Monoclinic, $P2_1/c$                                        | Mo $K\alpha$ radiation, $\lambda = 0.71073 \text{ \AA}$             |
| $a = 3.7348 (10) \text{ \AA}$                               | Cell parameters from 710 reflections                                |
| $b = 11.013 (3) \text{ \AA}$                                | $\theta = 5.5\text{--}27.6^\circ$                                   |
| $c = 5.7044 (14) \text{ \AA}$                               | $\mu = 0.13 \text{ mm}^{-1}$                                        |
| $\beta = 96.47 (1)^\circ$                                   | $T = 296 \text{ K}$                                                 |
| $V = 233.13 (10) \text{ \AA}^3$                             | Plate, yellow                                                       |
| $Z = 2$                                                     | $0.20 \times 0.18 \times 0.05 \text{ mm}$                           |
| Bruker D8 QUEST PHOTON 100 diffractometer                   | 424 reflections with $I > 2\sigma(I)$                               |
| Detector resolution: $10.42 \text{ pixels mm}^{-1}$         | $R_{\text{int}} = 0.022$                                            |
| $\phi$ and $\omega$ scans                                   | $\theta_{\text{max}} = 27.7^\circ, \theta_{\text{min}} = 5.5^\circ$ |
| Absorption correction: multi-scan <i>SADABS</i>             | $h = -3 \rightarrow 4$                                              |
| $T_{\text{min}} = 0.615, T_{\text{max}} = 0.746$            | $k = -14 \rightarrow 14$                                            |
| 1148 measured reflections                                   | $l = -7 \rightarrow 5$                                              |
| 529 independent reflections                                 |                                                                     |
| Refinement on $F^2$                                         | 0 restraints                                                        |
| Least-squares matrix: full                                  | Hydrogen site location: inferred from neighbouring sites            |
| $R[F^2 > 2\sigma(F^2)] = 0.039$                             | H-atom parameters constrained                                       |
| $wR(F^2) = 0.101$                                           | $w = 1/[\sigma^2(F_o^2) + (0.039P)^2 + 0.0785P]$                    |

|                 |                                                    |
|-----------------|----------------------------------------------------|
|                 | where $P = (F_o^2 + 2F_c^2)/3$                     |
| $S = 1.04$      | $(\Delta/\sigma)_{\max} < 0.001$                   |
| 529 reflections | $\Delta_{\max} = 0.15 \text{ e } \text{\AA}^{-3}$  |
| 37 parameters   | $\Delta_{\min} = -0.17 \text{ e } \text{\AA}^{-3}$ |

Data collection: Bruker *APEX3*; cell refinement: Bruker *SAINT*; data reduction: Bruker *SAINT*; program(s) used to solve structure: SHELXT 2014/5 (Sheldrick, 2014); program(s) used to refine structure: *SHELXL2018/3* (Sheldrick, 2018); molecular graphics: Bruker *SHELXTL*; software used to prepare material for publication: Bruker *SHELXTL*. Similar to  $\text{N}_2\text{H}_5\text{N}_5/\text{PDO}$ , the PDO molecule in  $P2_1/c$  again lies about an inversion centre.

**Table S4.** Hydrogen bonds ( $\text{\AA}$ ,  $^\circ$ ) for PDO

| $D-H\cdots A$                              | $D-H$ | $H\cdots A$ | $D\cdots A$ | $D-H\cdots A$ |
|--------------------------------------------|-------|-------------|-------------|---------------|
| $\text{C2-H2}\cdots\text{O1}^{\text{ii}}$  | 0.93  | 2.27        | 3.169 (2)   | 162           |
| $\text{C1-H1}\cdots\text{O1}^{\text{iii}}$ | 0.93  | 2.30        | 3.2081 (19) | 167           |

Symmetry codes: (ii)  $x, -y+3/2, z-1/2$ ; (iii)  $-x+2, -y+1, -z+2$ .

#### 4. The noncovalent interactions study

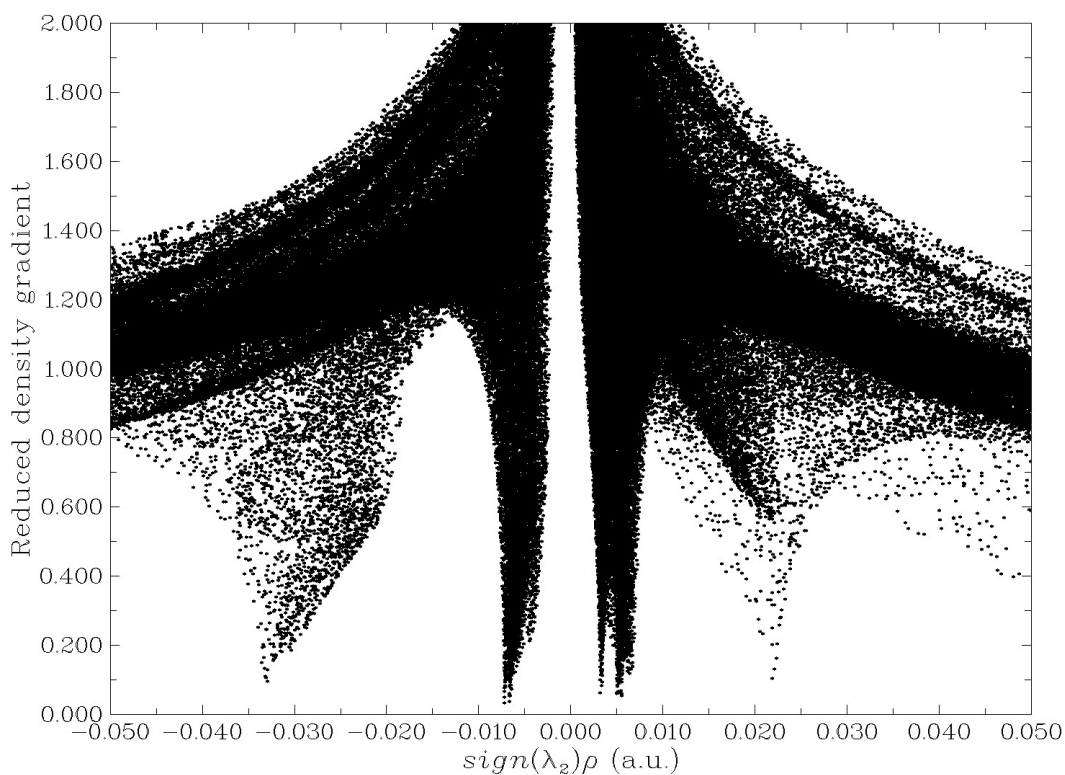

**Fig. S1** Plots of the reduced density gradient versus the electron density multiplied by the sign of the second Hessian eigenvalue for  $\text{N}_2\text{H}_5\text{N}_5/\text{PDO}$ .

## 5. IR spectrum

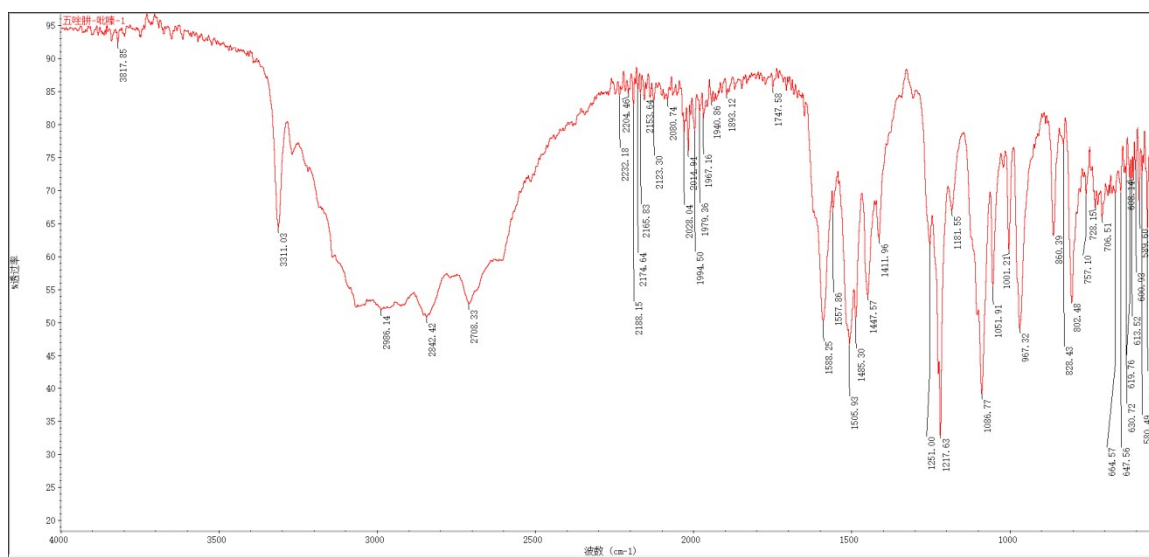

**Fig. S2** The IR spectrum of N<sub>2</sub>H<sub>5</sub>N<sub>5</sub>/PDO.

## 6. NMR spectra

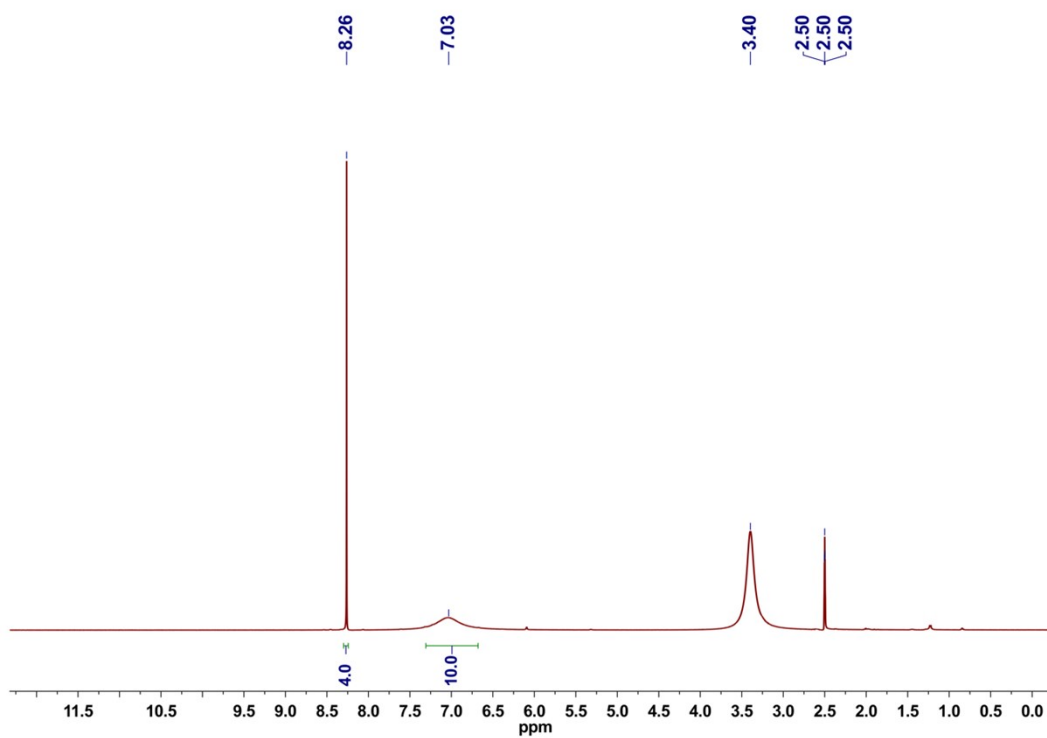

**Fig. S3** <sup>1</sup>H NMR spectrum of N<sub>2</sub>H<sub>5</sub>N<sub>5</sub>/PDO in d<sub>6</sub>-DMSO.



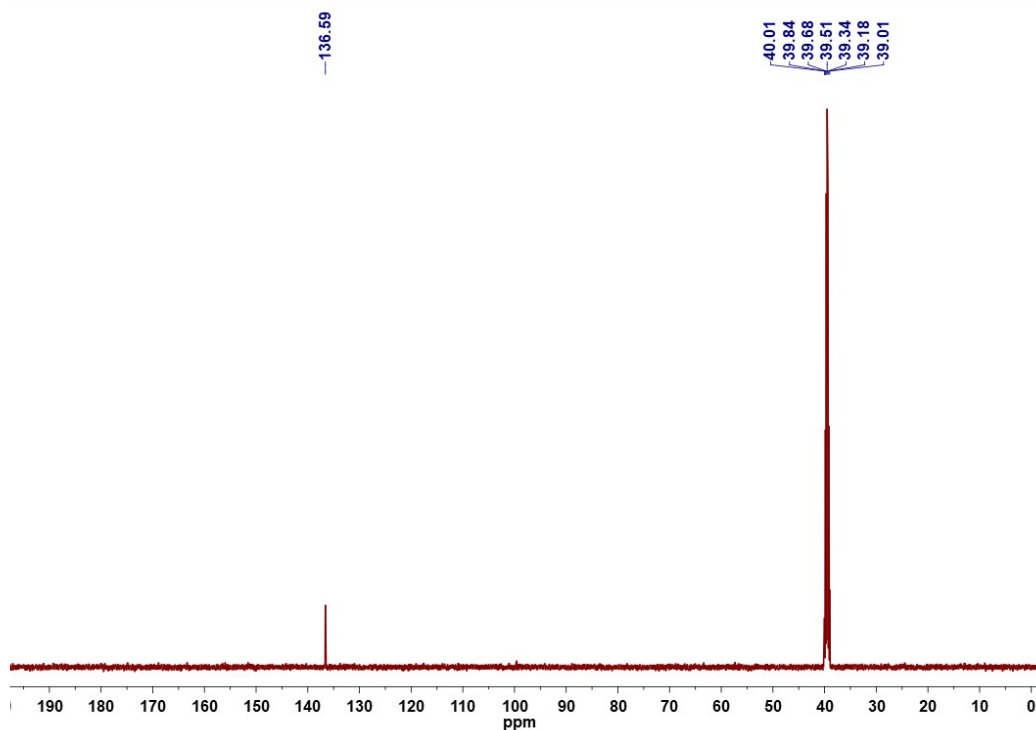

**Fig. S4**  $^{13}\text{C}$  NMR spectrum of  $\text{N}_2\text{H}_5\text{N}_5/\text{PDO}$  in  $d_6$ -DMSO.

## 7. PXRD patterns

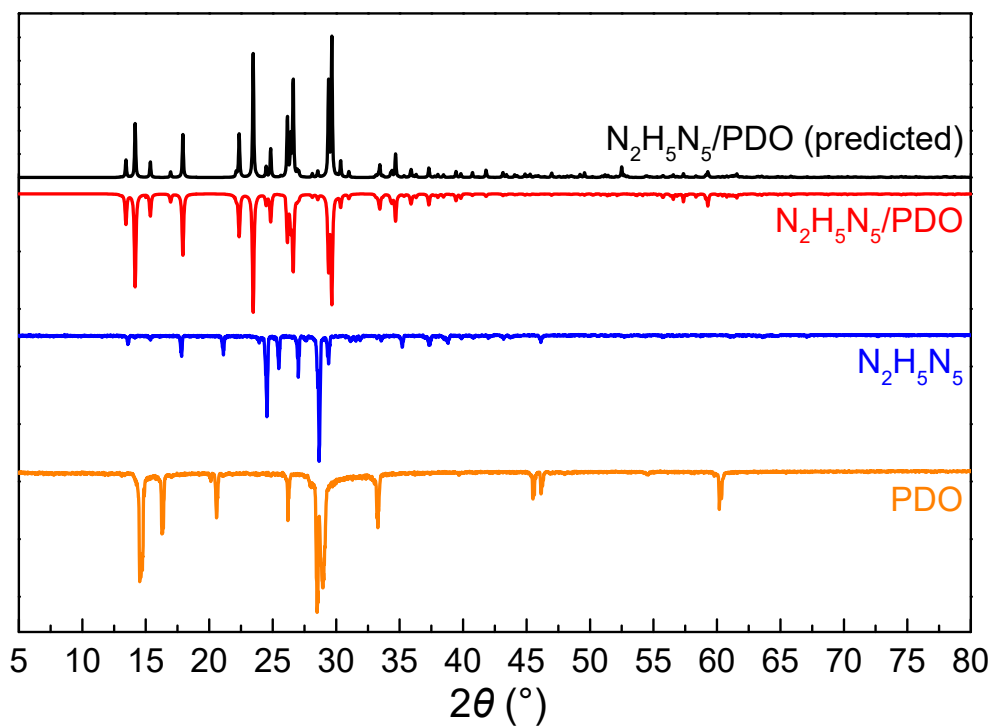

**Fig. S5** The PXRD pattern of  $\text{N}_2\text{H}_5\text{N}_5/\text{PDO}$ ,  $\text{N}_2\text{H}_5\text{N}_5$ , and PDO and the predicted  $\text{N}_2\text{H}_5\text{N}_5/\text{PDO}$  pattern from single-crystal structure.

## 8. Computational details

1. Input the densities, heats of formation and molecular formulas of  $N_2H_5N_5$  and PDO into EXPLO5 software. The relevant data of  $N_2H_5N_5$  is from Ref. 1. The density of PDO is from its crystal density, and its heat of formation is from Ref. 3.

| Compound    | Formula        | TMD, g/Hf, kJ/mol | C     | H | N | O |
|-------------|----------------|-------------------|-------|---|---|---|
| $N_2H_5N_5$ | $H_5N_7$       | 1.583             | 429.6 | 0 | 5 | 7 |
| PDO         | $C_4H_4N_2O_2$ | 1.597             | -4.8  | 4 | 4 | 2 |

2. According to the molar ratio (2:1) of  $N_2H_5N_5$  and PDO in cocrystal, its mass ratio is 64.78% : 35.22%. Because only integers can be entered in EXPLO5 software, it takes 65% and 35%.

General information  
 Job title:   
 Comment:

Running mode  
 Detonation  
 Kinetic detonation  
 Shock Hugoniot  
 Isochoric combustion  
 Isobaric combustion

Reaction products  
 Main products (standard run)  
 All products (advanced run)

List of reactants in Database  
 Search reactant:   
 > AFX-902 (95% NQ/5% VitonA)  
 > ALEX-20 (44% RDX/32% TNT/20% Al/4% Wax)  
 > ALEX-32 (37.4% RDX/27.8% TNT/30.8% Al/4% Wax)  
 > Amatol (50% AN/50% TNT)  
 > Amatol (60% AN/40% TNT)  
 > Amatol (80% AN/20% TNT)  
 > Ammonal (22% AN/67% TNT/11% Al)  
 > ANFO (94% AN/6% Fuel Oil)

Composition:

|   | Reactant    | Amount (%) |
|---|-------------|------------|
| 1 | PDO         | 35         |
| 2 | $N_2H_5N_5$ | 65         |

$\Sigma =$  100.000 Continue

EOS parameters and density  
 Gas EOS  
 BKW EOS  
 EXP-6 EOS  
 BKW EOS constants  
 BKWN (default)  
 Initial state of reactant and initial guesses  
 Density: 1.587872 g/cm3  
 Initial pressure: 0.1 MPa  
 Initial guess temperature: 3600 K

3. After the software calculation is completed, the heat of formation, detonation velocity and detonation pressure of cocrystal are read from the output results.

```

-----
1. PDO, 35 %
2. N2H5N5, 65 %

C(1.325) H(4.669) N(5.344) O(0.662)

Molecular weight          = 106.07
Density of reactant       = 1.587872 g/cm3
Initial pressure         = 0.1 MPa
Oxygen balance           = -65.18446 %
Enthalpy of formation     = 2693.56 kJ/kg
Energy of formation      = 2845.56 kJ/kg

DETONATION PARAMETERS (at the C-J point) :
-----

Heat of detonation        = -4496.758 kJ/kg
Detonation temperature    = 2827.181 K
Detonation pressure       = 26.55952 GPa
Detonation velocity       = 8734.524 m/s
Particle velocity         = 1914.979 m/s
Sound velocity            = 6819.546 m/s
Density of products      = 2.033758 g/cm3
  
```

## 9. References

- 1 Y. Xu, L. Tian, D. Li, P. Wang and M. Lu, *J. Mater. Chem. A*, 2019, **7**, 12468-12479.
- 2 V. N. Yadav and C. H. Gorbitz, *Acta. Crystallogr. C. Struct. Chem.*, 2014, **70**, 43-5.
- 3 W. E. Acree, Joyce R. Powell, Sheryl A. Tucker, Maria D. M. C. Ribeiro da Silva, M. Agostinha R. Matos, J. M. Gonçalves, L. M. N. B. F. Santos, V. M. F. Morais and G. Pilcher, *J. Org. Chem.*, 1997, **62**, 3722-3726.
